# Supplementary material for: Super-stretchable, elastic and recoverable ionic conductive hydrogel for wireless wearable, stretchable sensor
Source: Royal Society of Chemistry journal article supplement (doi:10.1039/d0ta02902e), 2020-01-01
Supplement: d0ta02902e1.pdf [file d0ta02902e1.pdf]

## Supporting Information

### **Super-Stretchable, Recoverable, Elastic and High-voltage Ionic Conductive Hydrogel for Wireless Wearable Stretchable Sensor**

Hailong Huang<sup>a&</sup>, Lu Han<sup>a&</sup>, Junfeng Li<sup>a</sup>, Xiaobin Fu<sup>b</sup>, Yanling Wang<sup>a</sup>, Zhongli Yang<sup>a</sup>, Likun Pan<sup>a\*</sup> and Min Xu<sup>a\*</sup>

*<sup>a</sup> School of Physics and Electronic Science & Shanghai Key Laboratory of Magnetic Resonance, East China Normal University, Shanghai 200062, China*

*<sup>b</sup> Department of Molten Salt Chemistry and Engineering, Shanghai Institute of Applied Physics, Chinese Academy of Sciences, Shanghai 201800, China.*

*Fax: +86 21 62234321; Tel: +86 21 62234132; E-mail: lkpan@phy.ecnu.edu.cn;*

*Fax: +86 21 62233281; Tel: + 86 21 62233263; E-mail: xumin@phy.ecnu.edu.cn.*

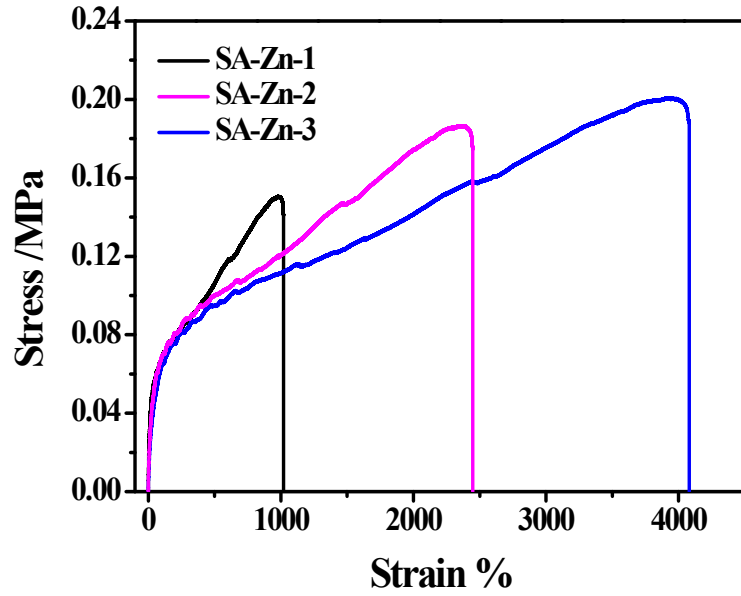

Figure S1. Control experiments of mechanical properties for SA-Zn (0.1-0.3 g).

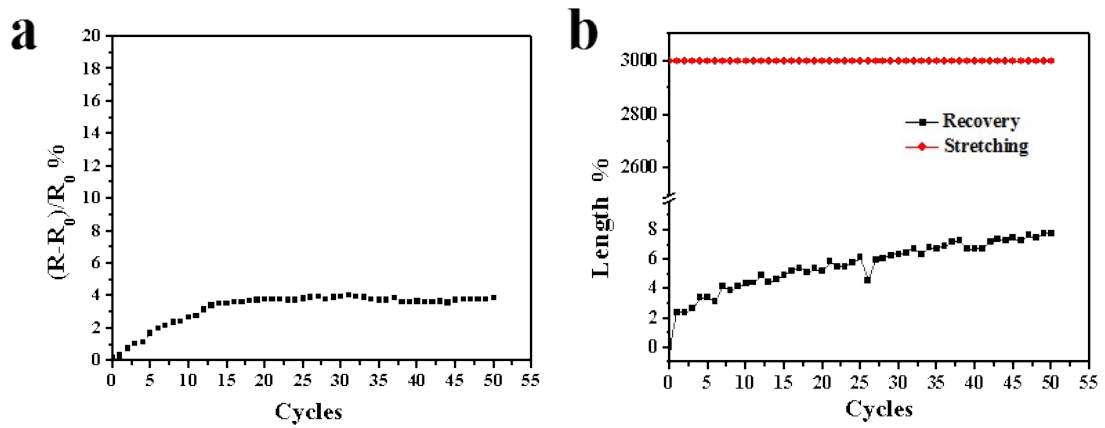

Figure S2. Reuseability of SA-Zn: during 50 cycles self-recovery processes with 3000% strain, the changes of resistance (a) and length (b).

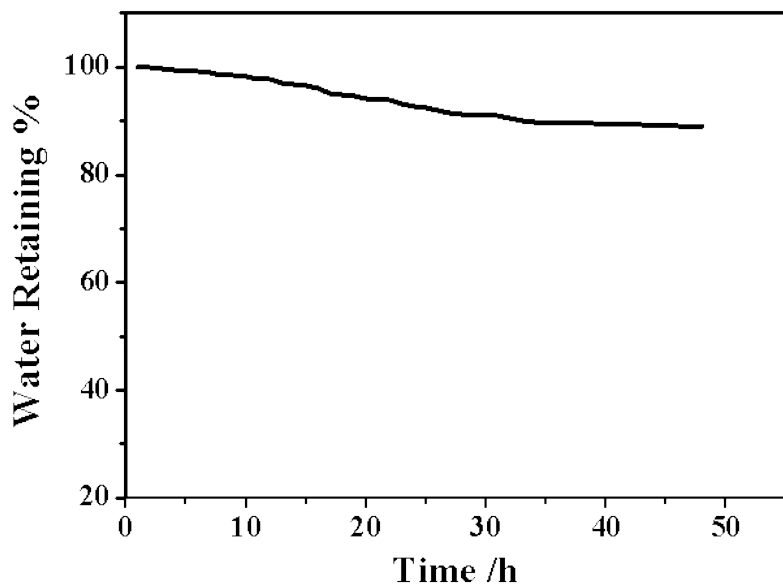

Figure S3. Water retaining property of SA-Zn hydrogel.

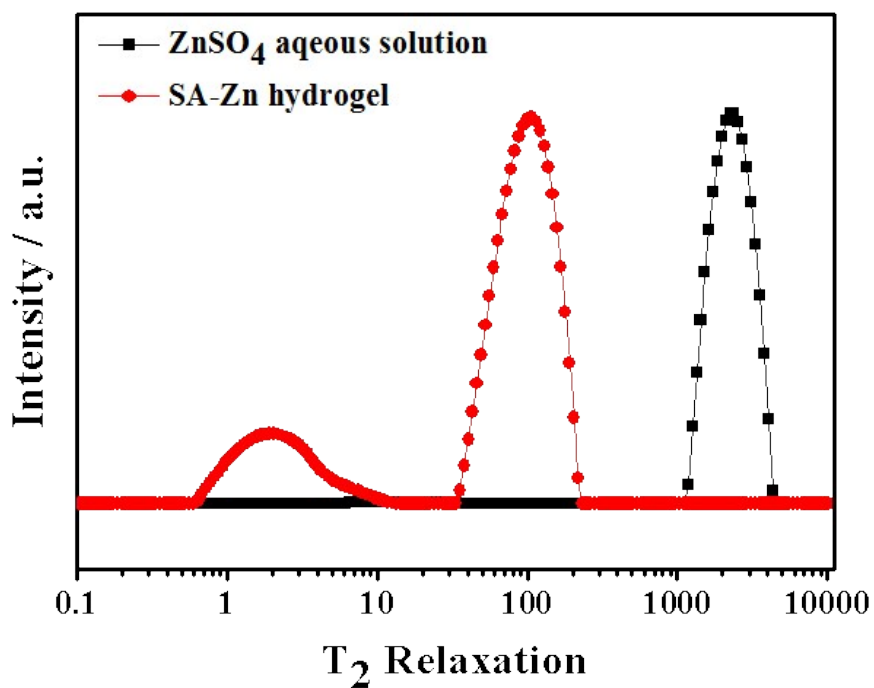

Figure S4. The reciprocal of spin-spin relaxation time of ZnSO<sub>4</sub> aqueous solution and SA-Zn hydrogel. T<sub>2</sub>: (<10 ms), bond water; T<sub>2</sub>: (10-100 ms), intermediate water; T<sub>2</sub>: (>1000 ms), free water.

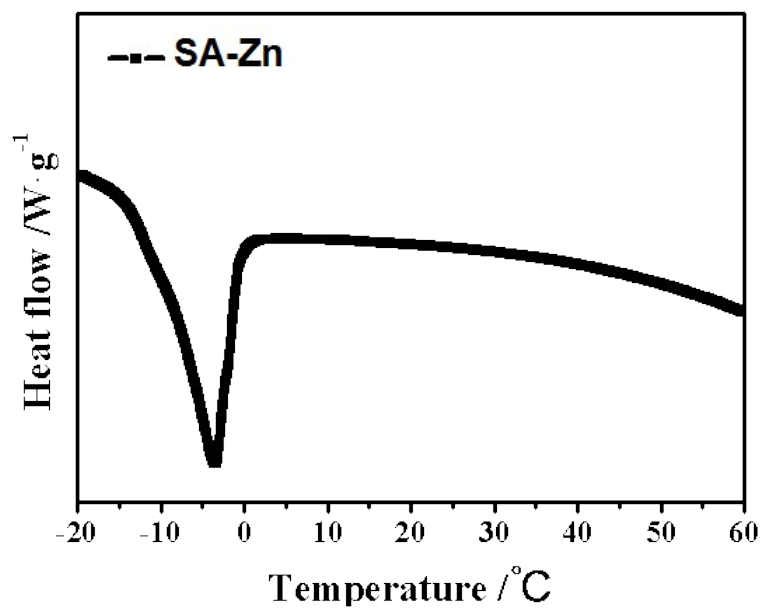

Figure S5. DSC thermogram of SA-Zn hydrogel.

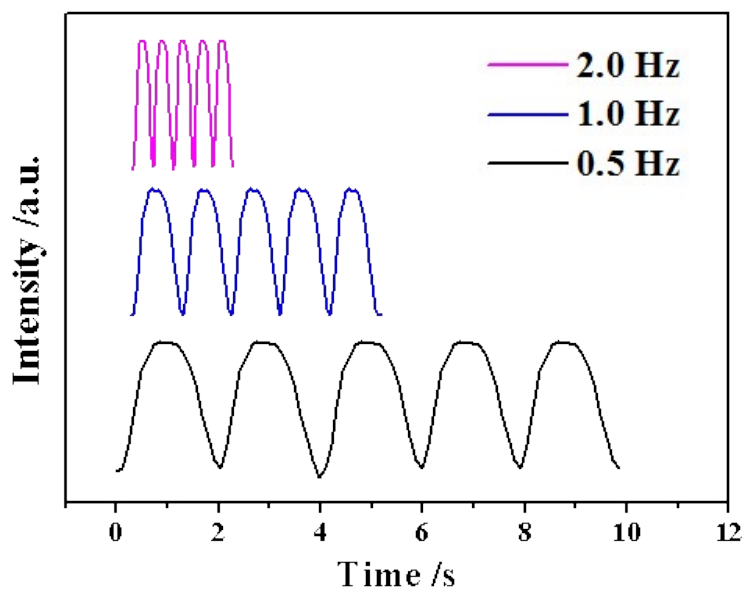

Figure S6. Response frequency of SA-Zn hydrogel.

Table S1. Comparison of this study with stretchable hydrogels sensor reported in the literature.

| <b>Tensile strain</b> | <b>Working Voltage</b> | <b>Recovery</b>   | <b>Reference</b> |
|-----------------------|------------------------|-------------------|------------------|
| <b>(%)</b>            | <b>(V)</b>             | <b>(%, Time)</b>  |                  |
| 4273                  | -2.5-2.5 V             | 100%, 20min       | This work        |
| 1800                  | 0.5 V                  | 100%,             | [1]              |
| 3400                  | /                      | /                 | [2]              |
| 625                   | /                      | 80%, 15min        | [3]              |
| 500                   | 1 V                    | /                 | [4]              |
| 1700                  | /                      | 90%, 4h           | [5]              |
| 850                   | /                      | 87.6%, 4h         | [6]              |
| 400%                  | /                      | 70.5%, 37°C, 24h  | [7]              |
| 1000%                 | /                      | 100%, 90°C, 20min | [8]              |

## References

- [1] X. Zhang, N. Sheng, L. Wang, Y. Tan, C. Liu, Y. Xia, Z. Nie and K. Sui, *Mater Horiz.*, 2019, **6**, 326-333.
- [2] Y. Zhang, K. H. Lee, D. H. Anjum, R. Sougrat, Q. Jiang, H. Kim and H. N. Alshareef, *Sci Adv.*, 2018, **4**, eaat0098.
- [3] Y. Liu, W. Cao, M. Ma and P. Wan, *Acs Appl Mater Inter.*, 2017, **9**, 25559-25570.
- [4] J. Sun, C. Keplinger, G. M. Whitesides and Z. Suo, *Adv Mater.*, 2014, **26**, 7608-7614.
- [5] Y. Yang, X. Wang, F. Yang, H. Shen and D. A. Wu, *Adv Mater.*, 2016, **28**, 7178-7184.
- [6] P. Lin, S. Ma, X. Wang and F. Zhou, *Adv Mater.*, 2015, **27**, 2054-2059.
- [7] S. Hong, D. Sycks, H. F. Chan, S. Lin, G. P. Lopez, F. Guilak, K. W. Leong and X. Zhao, *Adv Mater.*, 2015, **27**, 4035-4040.
- [8] X. Jing, H. Mi, X. Peng and L. Turng, *Carbon.*, 2018, **136**, 63-72.
